# Supplementary material for: Room-temperature water-vapor annealing for high-performance planar perovskite solar cells
Source: Royal Society of Chemistry journal article supplement (doi:10.1039/c6ta08655a), 2016-01-01
Supplement: c6ta08655a1.pdf [file c6ta08655a1.pdf]

## Supporting Information

### Room-Temperature Water-Vapor Annealing for High-Performance Planar Perovskite Solar Cell

*Binbin Wang,<sup>ab</sup> Zhi-guo Zhang,<sup>\*a</sup> Senyun Ye,<sup>c</sup> Haixia Rao,<sup>c</sup> Zuqiang Bian,<sup>c</sup> Chunhui Huang<sup>c</sup> and Yongfang Li<sup>\*ad</sup>*

*<sup>a</sup> Beijing National Laboratory for Molecular Sciences, CAS Key Laboratory of Organic Solids, Institute of Chemistry, Chinese Academy of Sciences, Beijing 100190, China*

*E-mail: liyf@iccas.ac.cn; zgzhangwhu@iccas.ac.cn*

*<sup>b</sup> School of Materials Science and Engineering, Henan Polytechnic University, Jiaozuo, Henan 454000, China*

*<sup>c</sup> Beijing National Laboratory for Molecular Sciences, State Key Laboratory of Rare Earth Materials and Applications, College of Chemistry and Molecular Engineering, Peking University, Beijing 100871, China*

*<sup>d</sup> Laboratory of Advanced Optoelectronic Materials, College of Chemistry, Chemical Engineering and Materials Science, Soochow University, Suzhou, Jiangsu 215123, China*

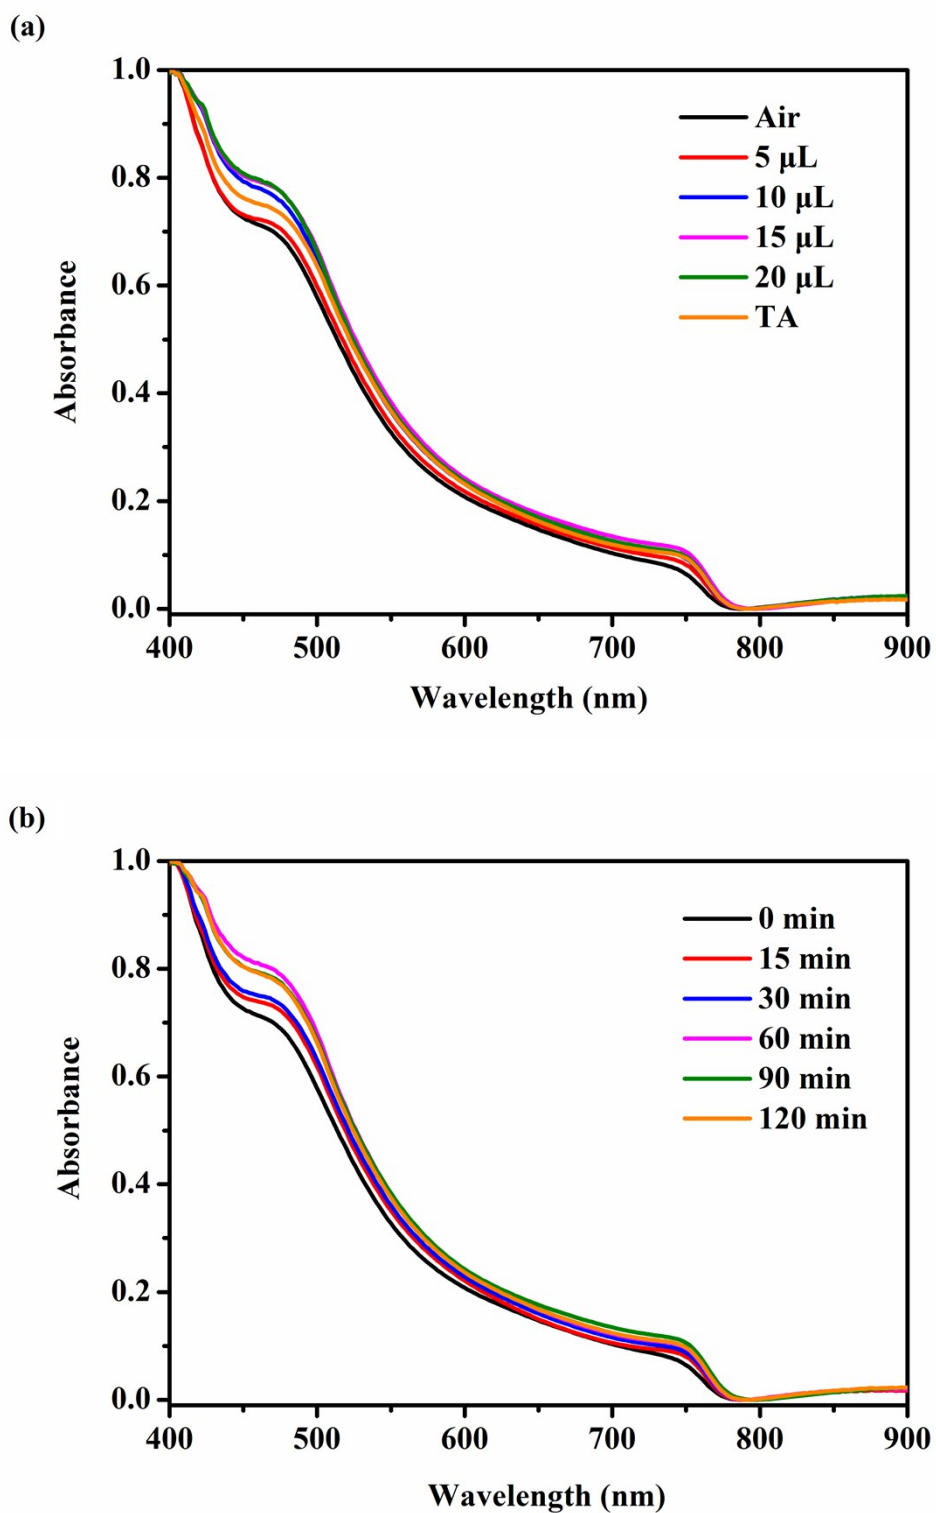

**Figure S1.** (a) Normalized UV-vis absorption spectra of the perovskite films treated by Air, TA and WVA with different volume of water for 60 minutes.(b) Normalized UV-vis absorption spectra of the perovskite films treated by WVA in RH% = 36~43% for different times.

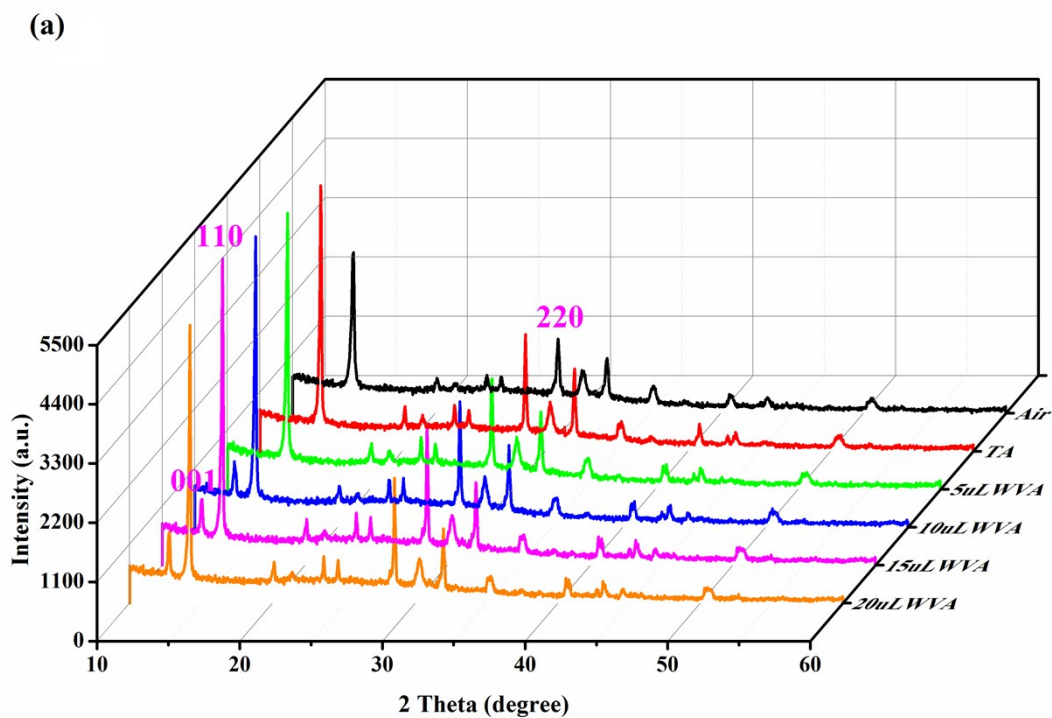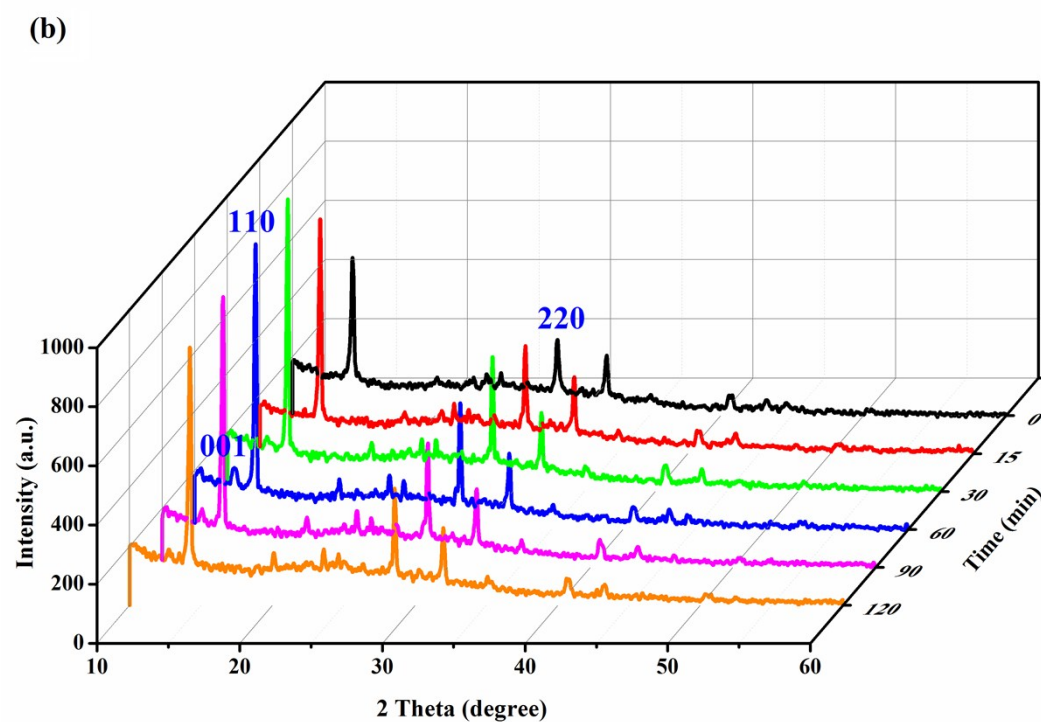

**Figure S2.** (a) XRD patterns of the perovskite films treated by Air, TA and WVA with different water volume for 60 minutes.(b) XRD patterns of the perovskite films treated by WVA in RH% = 36~43% for different times.

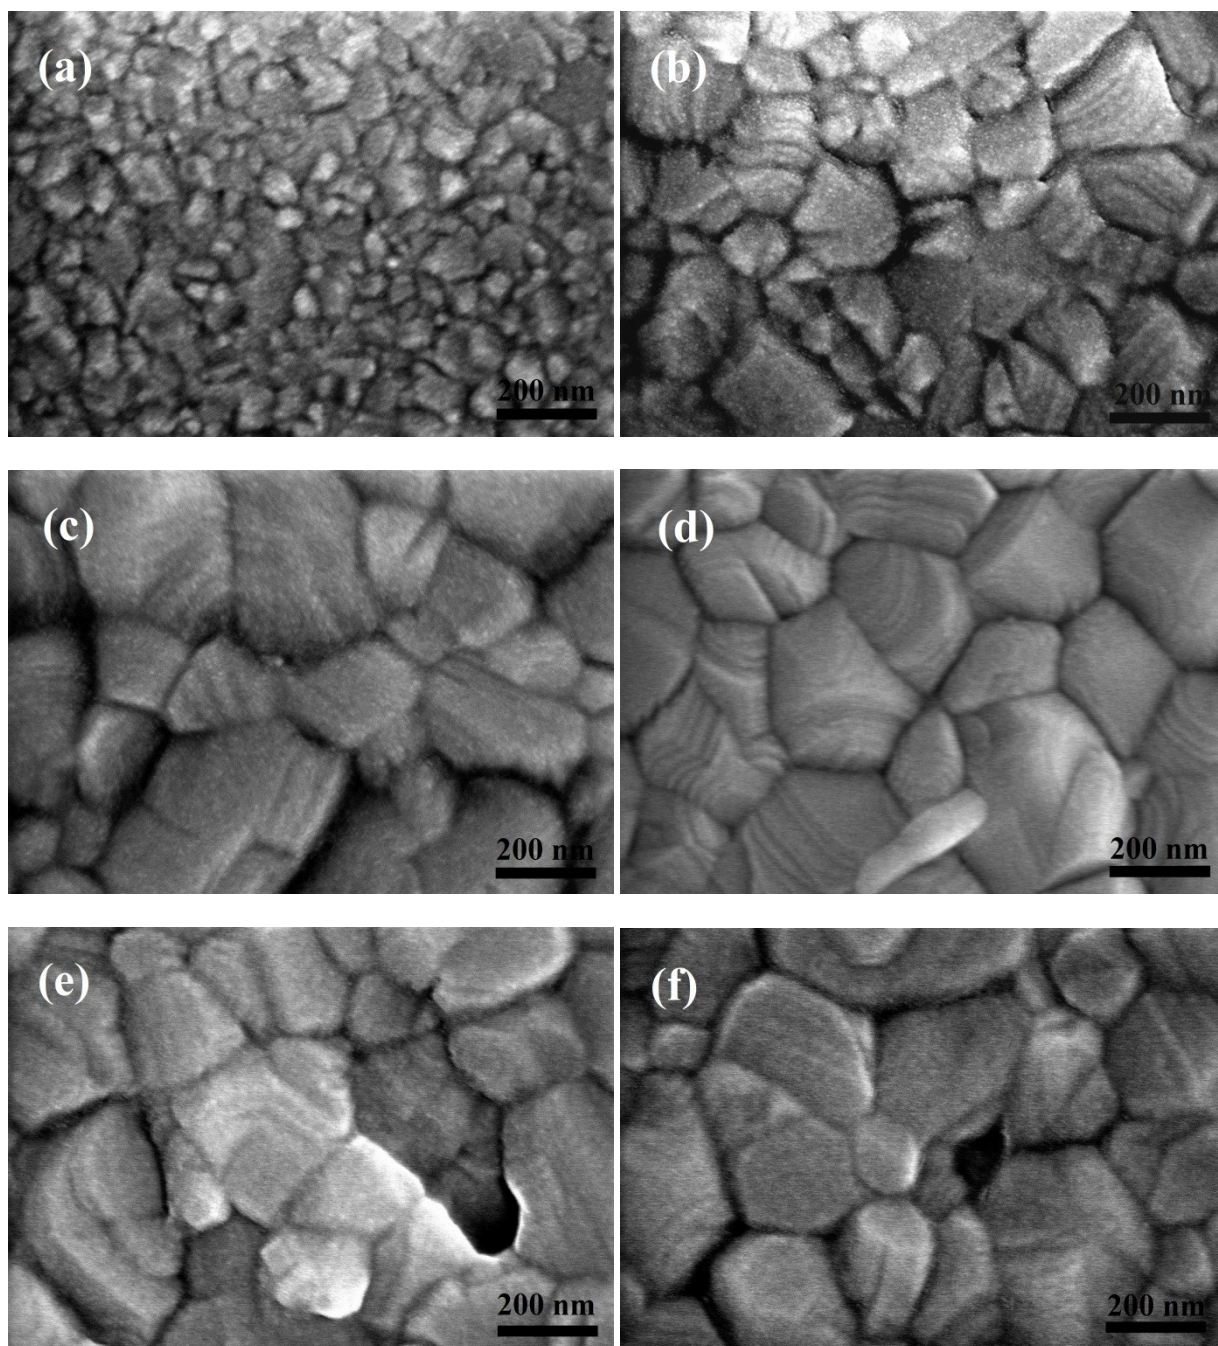

**Figure S3.** SEM images of the perovskite films treated by WVA in RH% = 36~43% for (a) 0 min, (b)15 min, (c) 30 min, (d) 60 min, (e) 90 min, (f) 120 min, respectively.

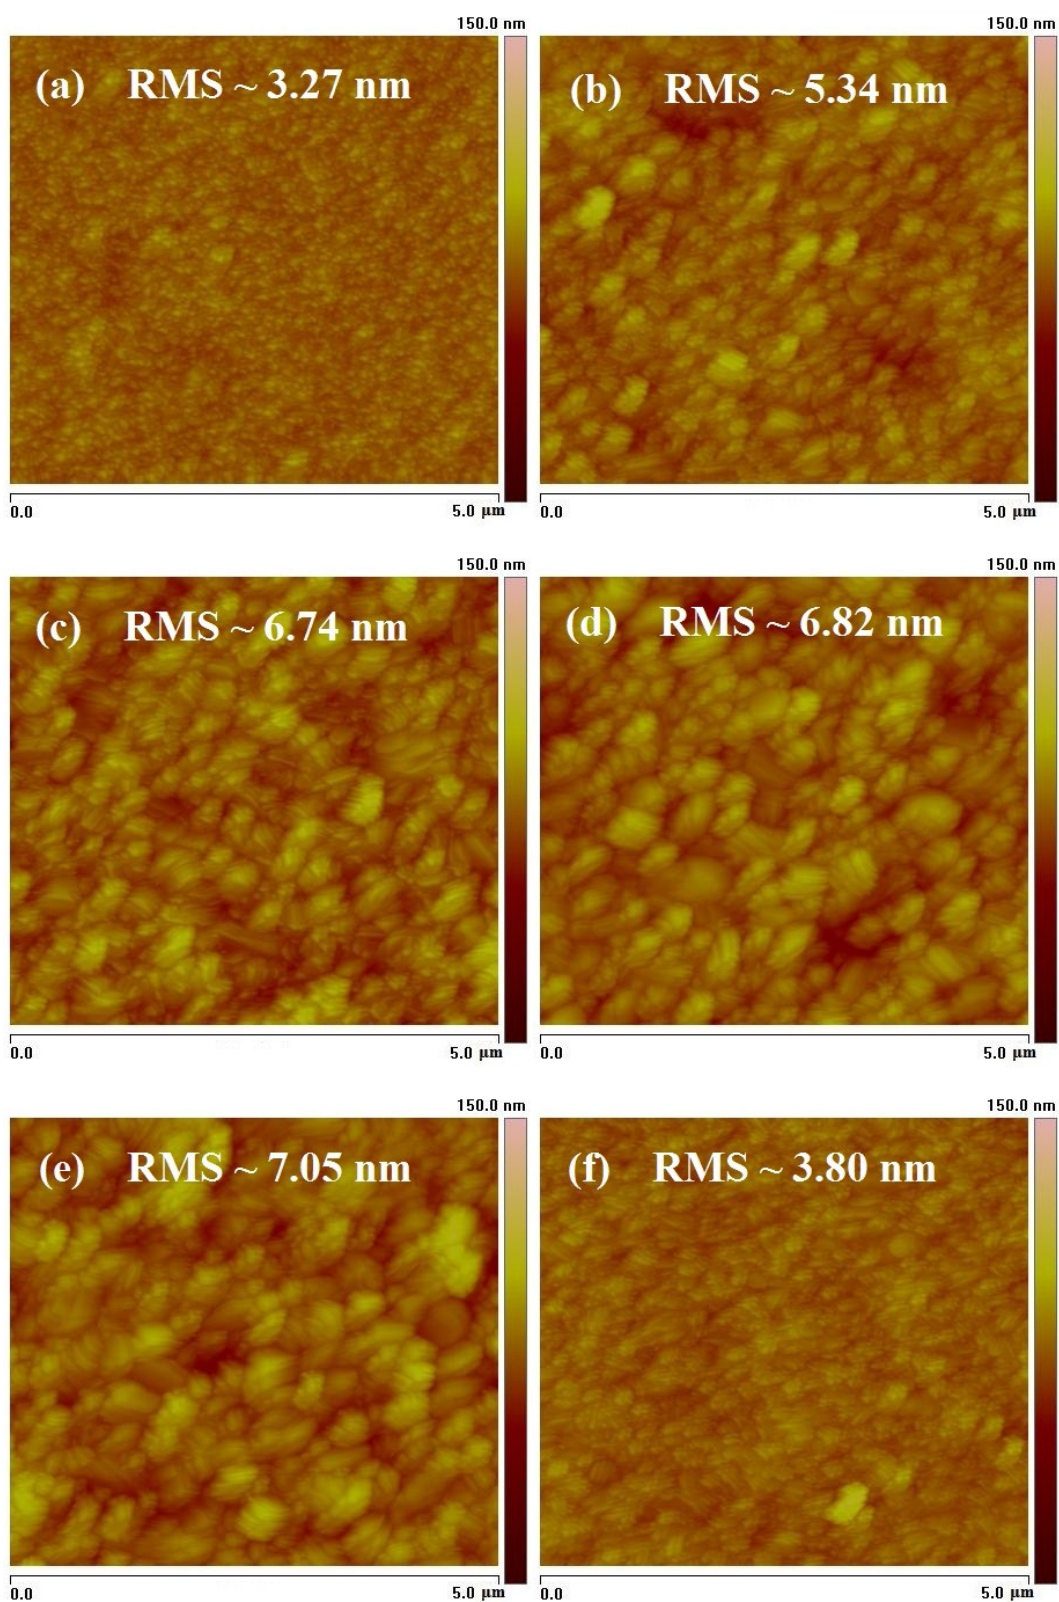

**Figure S4.** AFM images of the perovskite films treated by Air (a), TA (f) and WVA with 5 μL (b), 10 μL (c), 15 μL (d), 20 μL water (e) for 60 min.

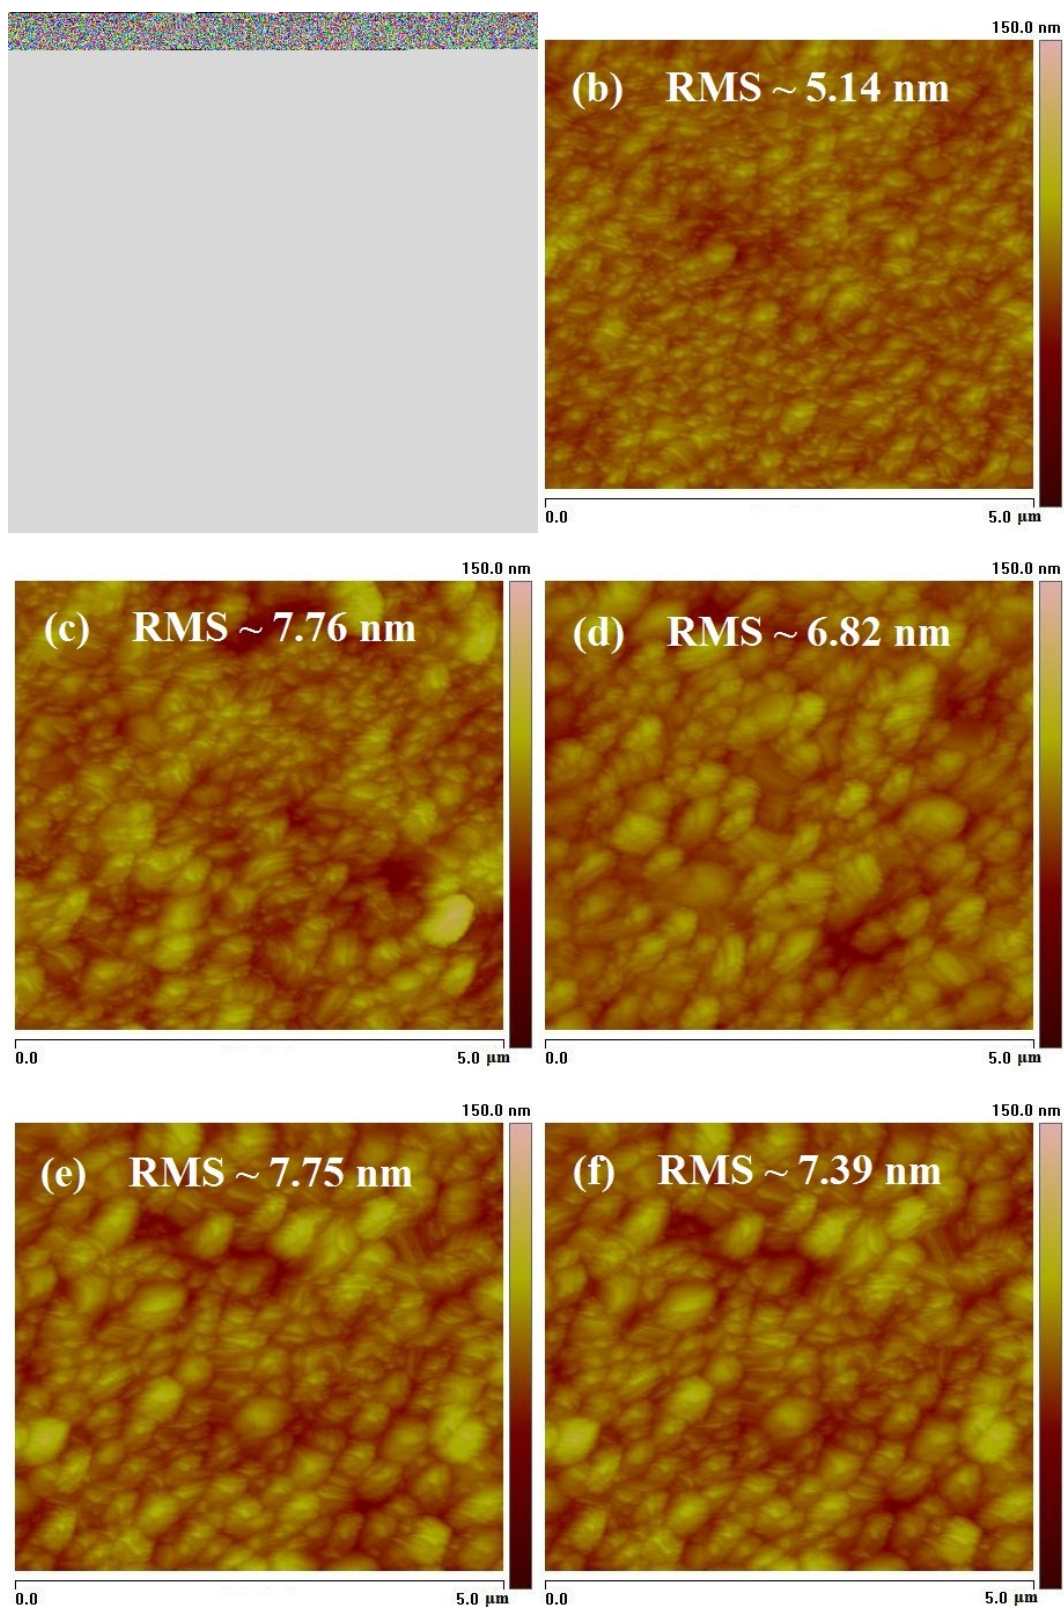

**Figure S5.** AFM images of the perovskite films treated by WVA in RH% = 36~43% for (a) 0 min, (b) 15 min, (c) 30 min, (d) 60 min, (e) 90 min, (f) 120 min, respectively.

**Table S1** Photovoltaic properties of the pero-SCs treated by Air, TA and WVA with 5  $\mu\text{L}$ , 10  $\mu\text{L}$ , 15  $\mu\text{L}$ , 20  $\mu\text{L}$  water for 60 minutes, under the illumination of AM1.5G, 100  $\text{mW cm}^{-2}$ .

|                  | $V_{oc}(\text{V})$ | $J_{sc}(\text{mA cm}^{-2})$ | $FF(\%)$ | $PCE (\%)$ |
|------------------|--------------------|-----------------------------|----------|------------|
| Air              | 0.93               | 7.67                        | 79.14    | 5.67       |
| 5 $\mu\text{L}$  | 0.98               | 15.62                       | 71.20    | 10.86      |
| 10 $\mu\text{L}$ | 1.00               | 19.21                       | 75.43    | 14.48      |
| 15 $\mu\text{L}$ | 0.99               | 20.83                       | 78.74    | 16.24      |
| 20 $\mu\text{L}$ | 0.94               | 19.84                       | 77.47    | 14.43      |
| TA               | 0.87               | 19.38                       | 76.86    | 12.88      |

**Table S2.** Photovoltaic properties of the pero-SCs treated by WVA in  $\text{RH}\% = 36\sim 43\%$  for 0, 15, 30, 60, 90, 120 minutes, respectively, under the illumination of AM1.5G, 100  $\text{mW cm}^{-2}$ .

| Time    | $V_{oc}(\text{V})$ | $J_{sc}(\text{mA cm}^{-2})$ | $FF(\%)$ | $PCE (\%)$ |
|---------|--------------------|-----------------------------|----------|------------|
| 0 min   | 0.93               | 7.67                        | 79.14    | 5.67       |
| 15 min  | 1.01               | 14.06                       | 71.40    | 10.13      |
| 30 min  | 0.99               | 19.47                       | 71.77    | 13.89      |
| 60 min  | 1.00               | 20.91                       | 78.75    | 16.39      |
| 90 min  | 0.93               | 19.94                       | 80.08    | 14.79      |
| 120 min | 0.94               | 18.07                       | 73.05    | 12.41      |

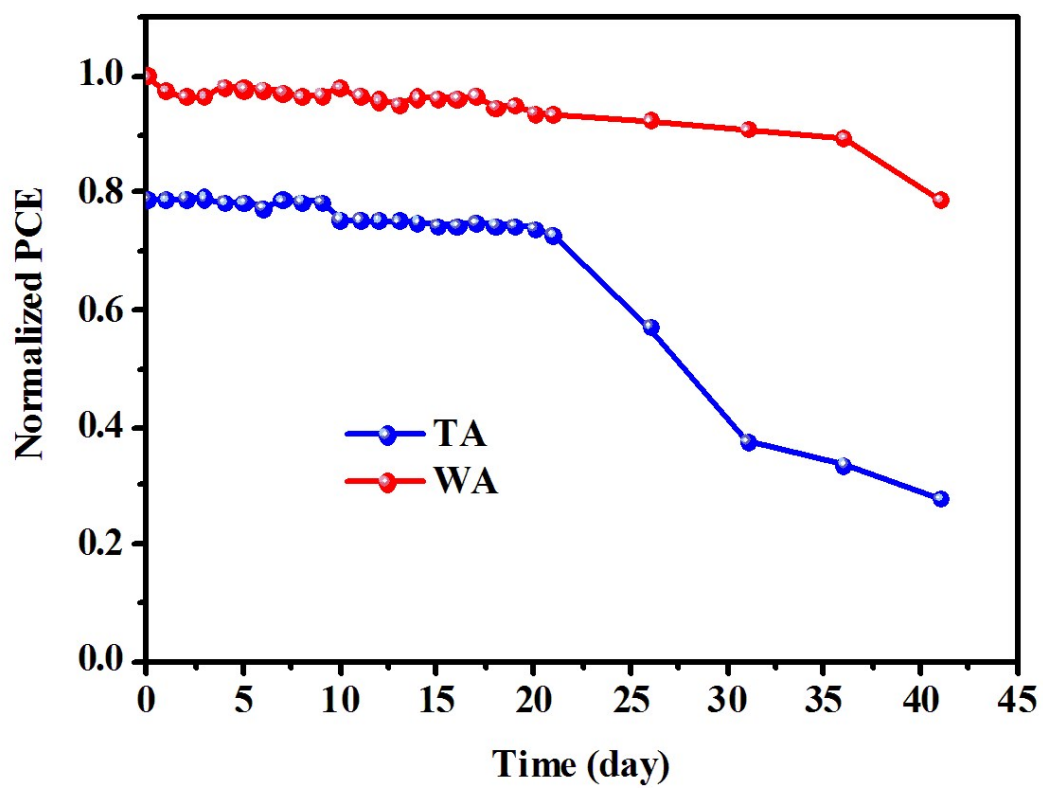

**Figure S6.** Long-term stability test of the pero-SCs treated by TA and WVA in RH% = 36~43% for 60 minutes (in a glove box).
